# Supplementary material for: Fabrication and photoactivity of short rod-shaped mesoporous SiO2@TiO2 composites with TiO2 shell
Source: Royal Society of Chemistry journal article supplement (doi:10.1039/c5ra18418e), 2016-01-01
Supplement: c5ra18418e1.pdf [file c5ra18418e1.pdf]

**Electronic Supplementary Material (ESI) for RSC Advances.  
This journal is ©The Royal Society of Chemistry 2015**

## **Electronic Supplementary Information**

### **Fabrication and Photoactivity of Short Rod-shaped Mesoporous SiO<sub>2</sub>@TiO<sub>2</sub> Composites with TiO<sub>2</sub> Shell**

Pei Cao, Guowei Zhou,\* Yixian Ren, and Hong Xiao

*Key Laboratory of Fine Chemicals in Universities of Shandong, School of Chemistry  
and Pharmaceutical Engineering, Qilu University of Technology, Jinan 250353,  
Shandong, People's Republic of China*

\*Corresponding author: gwzhou@qlu.edu.cn, guoweizhou@hotmail.com (G. W. Zhou).

Tel: +86 531 89631696

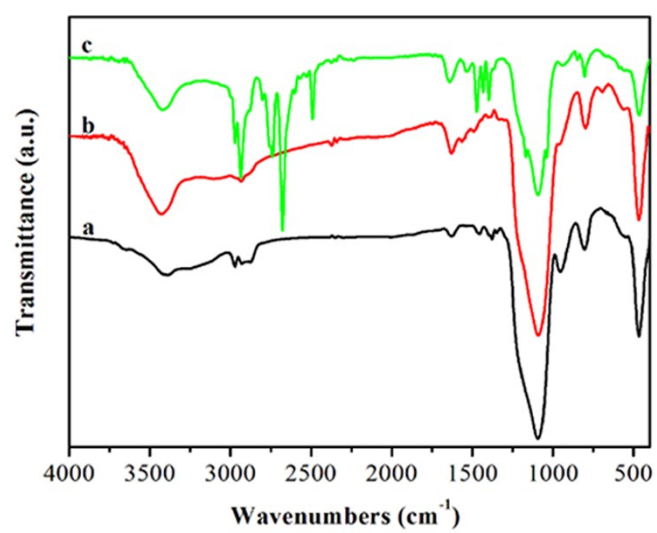

**Figure S1.** FT-IR spectra of (a) SiO<sub>2</sub>, (b) SiO<sub>2</sub>-NH<sub>2</sub>, and (c) SiO<sub>2</sub>-Br

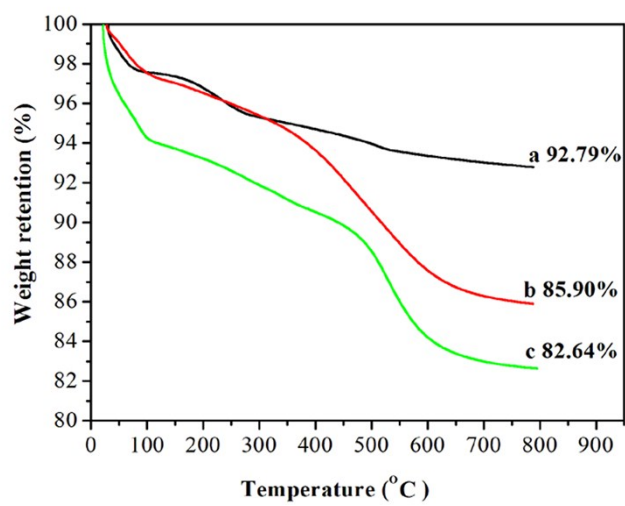

**Figure S2.** TGA results of (a) SiO<sub>2</sub>, (b) SiO<sub>2</sub>-NH<sub>2</sub>, and (c) SiO<sub>2</sub>-Br

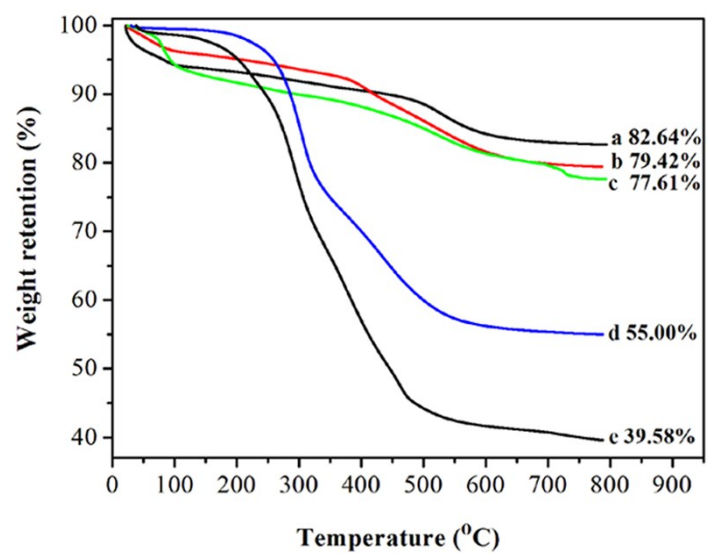

**Figure S3.** TGA results of (a) SiO<sub>2</sub>, (b) SiO<sub>2</sub>-NH<sub>2</sub>, (c) SiO<sub>2</sub>-Br, (d) SiO<sub>2</sub>-PGMA and (e) SiGE4

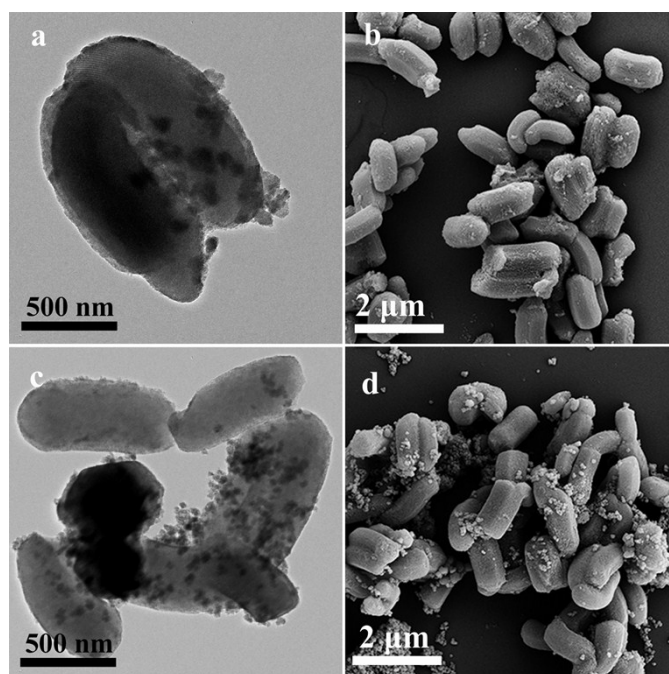

**Figure S4.** TEM of (a) SiO<sub>2</sub>@TiO<sub>2</sub>-4, (c) SiO<sub>2</sub>@TiO<sub>2</sub>-5, and FESEM of (b) SiO<sub>2</sub>@TiO<sub>2</sub>-4, (d) SiO<sub>2</sub>@TiO<sub>2</sub>-5

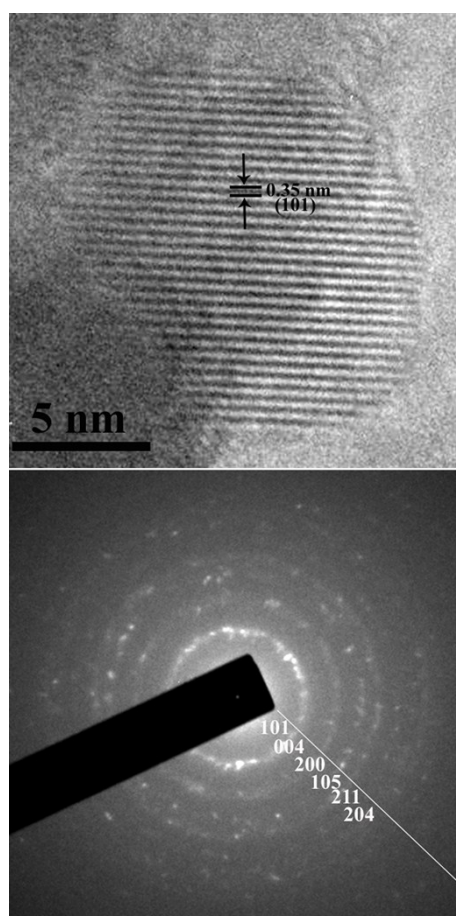

**Figure S5.** HRTEM of (a) lattice image of  $\text{SiO}_2@\text{TiO}_2\text{-2}$  and (b) SAED of  $\text{SiO}_2@\text{TiO}_2\text{-2}$

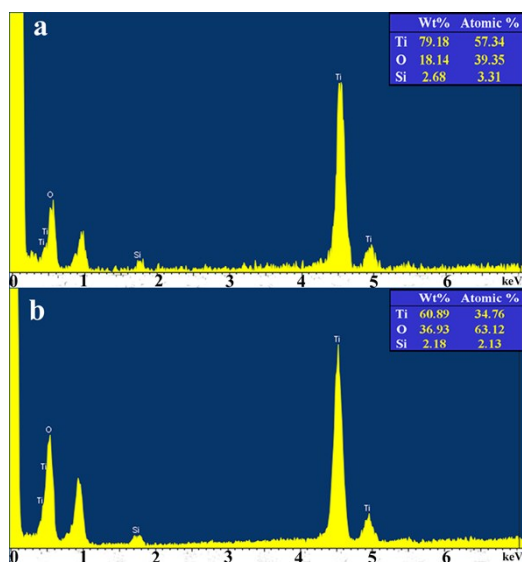

**Figure S6.** EDS results of (a) SiO<sub>2</sub>@TiO<sub>2</sub>-4 and (b) SiO<sub>2</sub>@TiO<sub>2</sub>-5
